# Supplementary material for: A universal chemical potential for sulfur vapours
Source: Royal Society of Chemistry journal article supplement (doi:10.1039/c5sc03088a), 2015-10-16
Supplement: c5sc03088a1.zip [file c5sc03088a1.zip]

---

**12th August 2016**

Note added after first publication: This Supplementary Information file is provided in addition to those published on 12th November 2015, and clarifies the parameterisation presented in the main article.

---

## Clarification of parameterisation

The general form of the parameterisation includes several values that are themselves functions of temperature and pressure.

$$\begin{aligned}\mu_S(T, P) = & \frac{1}{2} \left( \operatorname{erfc} \left( \frac{T - T_{tr}}{w} \right) \right) \frac{\mu_{S8}}{8} \\ & + \frac{1}{2} \left( \operatorname{erf} \left( \frac{T - T_{tr}}{w} \right) + 1 \right) \frac{\mu_{S2}}{2} \\ & - a \exp \left( - \frac{(T - (T_{tr} - b))^2}{2c^2} \right)\end{aligned}$$

where  $T_{tr}$  and  $a$  are represented by the polynomials in  $\log_{10}(P/\text{Pa})$

$$\begin{aligned}T_{tr} &= \sum_i x_{Ttr,i} \left( \log_{10} \left( \frac{P}{\text{Pa}} \right) \right)^i \\ a &= a_0 + a_1 \log_{10} \left( \frac{P}{\text{Pa}} \right) + a_2 \left( \log_{10} \left( \frac{P}{\text{Pa}} \right) \right)^2,\end{aligned}$$

and  $\mu_{S8}$ ,  $\mu_{S2}$  are pressure-corrected polynomials in  $T$

$$\begin{aligned}\mu_{S8} &= \sum_i x_{S8,i} T^i + kT \ln \frac{P}{P_{\text{ref}}}, \\ \mu_{S2} &= \sum_i x_{S2,i} T^i + kT \ln \frac{P}{P_{\text{ref}}}\end{aligned}$$

where  $P_{\text{ref}}$  is  $10^5$  Pa.

Tabulated values are given below in two systems of units. In all cases the group  $\frac{P}{\text{Pa}}$  is equal to the pressure in Pascals. If calculating the properties for a basis of one mole of S atoms (i.e. in  $\text{J mol}^{-1}$ ) then  $k$  is the gas constant  $R = 8.314 \text{ J mol}^{-1} \text{ K}^{-1}$ . For a basis of one atom  $k$  should be set to the Boltzmann constant  $k_B = 8.617\text{E-}5 \text{ eV K}^{-1}$ .

| Parameter          | Value      | units                                | Value      | units                                  |
|--------------------|------------|--------------------------------------|------------|----------------------------------------|
| x <sub>S8,0</sub>  | 7.352E+04  | J mol <sup>-1</sup>                  | 7.620E-01  | eV atom <sup>-1</sup>                  |
| x <sub>S8,1</sub>  | -2.370E+02 | J mol <sup>-1</sup> / K              | -2.457E-03 | eV atom <sup>-1</sup> / K              |
| x <sub>S8,2</sub>  | -3.871E-01 | J mol <sup>-1</sup> / K <sup>2</sup> | -4.012E-06 | eV atom <sup>-1</sup> / K <sup>2</sup> |
| x <sub>S8,3</sub>  | 1.744E-04  | J mol <sup>-1</sup> / K <sup>3</sup> | 1.808E-09  | eV atom <sup>-1</sup> / K <sup>3</sup> |
| x <sub>S8,4</sub>  | -3.676E-08 | J mol <sup>-1</sup> / K <sup>4</sup> | -3.810E-13 | eV atom <sup>-1</sup> / K <sup>4</sup> |
| x <sub>S2,0</sub>  | 1.165E+05  | J mol <sup>-1</sup>                  | 1.207E+00  | eV atom <sup>-1</sup>                  |
| x <sub>S2,1</sub>  | -1.783E+02 | J mol <sup>-1</sup> / K              | -1.848E-03 | eV atom <sup>-1</sup> / K              |
| x <sub>S2,2</sub>  | -8.265E-02 | J mol <sup>-1</sup> / K <sup>2</sup> | -8.566E-07 | eV atom <sup>-1</sup> / K <sup>2</sup> |
| x <sub>S2,3</sub>  | 3.860E-05  | J mol <sup>-1</sup> / K <sup>3</sup> | 4.001E-10  | eV atom <sup>-1</sup> / K <sup>3</sup> |
| x <sub>S2,4</sub>  | -8.350E-09 | J mol <sup>-1</sup> / K <sup>4</sup> | -8.654E-14 | eV atom <sup>-1</sup> / K <sup>4</sup> |
| x <sub>Ttr,0</sub> | 5.077E+02  | K                                    |            |                                        |
| x <sub>Ttr,1</sub> | 7.272E+01  | K                                    |            |                                        |
| x <sub>Ttr,2</sub> | -8.295E+00 | K                                    |            |                                        |
| x <sub>Ttr,3</sub> | 1.828E+00  | K                                    |            |                                        |
| a <sub>0</sub>     | 1.414E+03  | J mol <sup>-1</sup>                  | 1.465E-02  | eV atom <sup>-1</sup>                  |
| a <sub>1</sub>     | -2.041E+02 | J mol <sup>-1</sup>                  | -2.115E-03 | eV atom <sup>-1</sup>                  |
| a <sub>2</sub>     | 6.663E+01  | J mol <sup>-1</sup>                  | 6.905E-04  | eV atom <sup>-1</sup>                  |
| b                  | 10         | K                                    |            |                                        |
| c                  | 80         | K                                    |            |                                        |
| w                  | 100        | K                                    |            |                                        |
